# Supplementary material for: Syndrome of Undifferentiated Recurrent Fever (SURF): An Emerging Group of Autoinflammatory Recurrent Fevers
Source: MDPI journal article supplement (doi:10.3390/jcm10091963), 2021-05-03
Supplement: s1 [file s1]

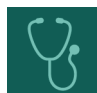

*Supplementary Material*

# Syndrome of Undifferentiated Recurrent Fever (SURF): an Emerging Group of Autoinflammatory Recurrent Fevers

Riccardo Papa, Federica Penco, Stefano Volpi, Diana Suter, Roberta Caorsi and Marco Gattorno \*

Center for Autoinflammatory Diseases and Immunodeficiencies, IRCCS Istituto Giannina Gaslini, Genoa, Italy

\*Correspondence: marcogattorno@gaslini.org; Tel.: 0039-01056361

**Table S1.** Analysed genes in the studies of the Table 1.

| N° | Study                     | Analysed genes*                                                                                                         |
|----|---------------------------|-------------------------------------------------------------------------------------------------------------------------|
| 1  | Chandrasekaran et al. [5] | MEFV, MVK, TNFRSF1A, NLRP3, LPIN2, PSTPIP1, ELANE                                                                       |
| 2  | De Pieri et al. [6]       | MEFV, MVK, TNFRSF1A, NLRP3, NLRP12                                                                                      |
| 3  | Rusmini et al. [2]        | MEFV, MVK, TNFRSF1A, NLRP3, NLRP12, NOD2, PSMB8, PSTPIP1, IL1RN, LPIN2                                                  |
| 4  | Nakayama et al. [7]       | MEFV, MVK, TNFRSF1A, NLRP3, NLRP12, NOD2, PSMB8, PSTPIP1, IL1RN                                                         |
| 5  | Omoyinmi et al. [8]       | See supplementary tables of the study                                                                                   |
| 6  | Kostik et al. [9]         | See supplementary tables of the study                                                                                   |
| 7  | Karacan et al. [10]       | MEFV, MVK, TNFRSF1A, NLRP3, NLRP12, NLRP4, LPIN2, NOD2, PLCG2, PSTPIP1, CECR1, CARD14, IL10RA, TMEM173, SLC29A3         |
| 8  | Ozyilmaz et al. [11]      | MEFV, MVK, TNFRSF1A, NLRP3                                                                                              |
| 9  | Hua et al. [12]           | WES                                                                                                                     |
| 10 | Boursier et al. [13]      | See supplementary tables of the study                                                                                   |
| 11 | Papa et al. [3]           | See supplementary tables of the study                                                                                   |
| 12 | Suspitsin et al. [14]     | See supplementary tables of the study                                                                                   |
| 13 | Sözeri et al. [15]        | MEFV, MVK, TNFRSF1A, NLRP3, NLRP12, TNFRSF11A, LPIN2, NOD2, PSMB8, PSTPIP1, IL1RN, CECR1, ELANE, CARD14, IL10RA, IL10RB |
| 14 | Hidaka et al. [16]        | MEFV, MVK, TNFRSF1A, NLRP3, NLRP12, NOD2, PSMB8, PSTPIP1, IL1RN, NLRP4, PLCG2                                           |
| 15 | Kosukcu et al. [17]       | WES                                                                                                                     |
| 16 | Wang et al. [18]          | WES                                                                                                                     |
| 17 | Demir et al. [19]         | MEFV, MVK, TNFRSF1A, NLRP3, NLRP12, TNFRSF11A, LPIN2, NOD2, PSMB8, PSTPIP1, IL1RN, CECR1, ELANE, CARD14, IL10RA, IL10RB |
| 18 | Rama et al. [20]          | See supplementary tables of the study                                                                                   |

\*NGS panels including >30 genes were not reported. WES, whole exome sequencing.
